# Supplementary material for: RRP7A links primary microcephaly to dysfunction of ribosome biogenesis, resorption of primary cilia, and neurogenesis
Source: PubMed Central journal article supplement (PMC7670429; doi:10.1038/s41467-020-19658-0), 2020-11-16
Supplement: 41467_2020_19658_MOESM3_ESM.pdf [file 41467_2020_19658_MOESM3_ESM.pdf]

## Reporting Summary

Nature Research wishes to improve the reproducibility of the work that we publish. This form provides structure for consistency and transparency in reporting. For further information on Nature Research policies, see our [Editorial Policies](#) and the [Editorial Policy Checklist](#).

### Statistics

For all statistical analyses, confirm that the following items are present in the figure legend, table legend, main text, or Methods section.

n/a Confirmed

- The exact sample size ( $n$ ) for each experimental group/condition, given as a discrete number and unit of measurement
- A statement on whether measurements were taken from distinct samples or whether the same sample was measured repeatedly
- The statistical test(s) used AND whether they are one- or two-sided  
*Only common tests should be described solely by name; describe more complex techniques in the Methods section.*
- A description of all covariates tested
- A description of any assumptions or corrections, such as tests of normality and adjustment for multiple comparisons
- A full description of the statistical parameters including central tendency (e.g. means) or other basic estimates (e.g. regression coefficient) AND variation (e.g. standard deviation) or associated estimates of uncertainty (e.g. confidence intervals)
- For null hypothesis testing, the test statistic (e.g.  $F$ ,  $t$ ,  $r$ ) with confidence intervals, effect sizes, degrees of freedom and  $P$  value noted  
*Give  $P$  values as exact values whenever suitable.*
- For Bayesian analysis, information on the choice of priors and Markov chain Monte Carlo settings
- For hierarchical and complex designs, identification of the appropriate level for tests and full reporting of outcomes
- Estimates of effect sizes (e.g. Cohen's  $d$ , Pearson's  $r$ ), indicating how they were calculated

*Our web collection on [statistics for biologists](#) contains articles on many of the points above.*

### Software and code

Policy information about [availability of computer code](#)

Data collection

Immunofluorescence images and z-stacks were acquired using CellSens Dimension software version 1.7 (Olympus). Western blotting Images obtained from the FUSION FX chemiluminescence system were acquired using the Evolution-Capt EDGE software version 18.01 (Vilber Lourmat). Zebrafish images were acquired using ZEN2 (Blue Edition) Imaging Software V1.0 (Carl Zeiss Microscopy GmbH, Göttingen, Germany). qRT-PCR data was collected using Quantstudio v.1.5.0 (Thermo-Fischer).

Data analysis

MRI Images were analysed using syngo fastView (version 1.0.0.3, Siemens AG). Genetic data analysis was performed using Chromosomal Analysis Suite v. 2.1 (Affymetrix), FASTLINK v.1.0 (<https://www.ncbi.nlm.nih.gov/CBBresearch/Schaffer/fastlink.html>), Peak Scanner 1.0 (Applied Biosystems) and chromaspro v. 2.1 (Technelysium Pty Ltd) software. NGS data was filtered and aligned to the Human Genome reference (hg38) using Burrows Wheel Alignment. Variants were analysed using the Genome Analysis Toolkit. Immunofluorescence intensities and cell confluency were enumerated with CellSens Dimension software version 1.7 (Olympus), and Image J version 2.0 and Adobe Photoshop CS6 version 13.0 were used for image processing. Band intensities in western blotting were analysed using ImageJ version 2.0 and UN-SCAN-IT gel version 6.1 (Silk Scientific Corporation). Northern blot band intensities were analysed using ImageQuant TL version 7.0 (Cytiva). Zebrafish embryos were measured using ImageJ software (v. 2.0.0-rc-69/1.52n). Statistical analyses were performed using GraphPad Prism v. 8.4.3, Sigmaplot 14.0 and Microsoft Excel version 2010.

For manuscripts utilizing custom algorithms or software that are central to the research but not yet described in published literature, software must be made available to editors and reviewers. We strongly encourage code deposition in a community repository (e.g. GitHub). See the Nature Research [guidelines for submitting code & software](#) for further information.

## Data

Policy information about [availability of data](#)

All manuscripts must include a [data availability statement](#). This statement should provide the following information, where applicable:

- Accession codes, unique identifiers, or web links for publicly available datasets
- A list of figures that have associated raw data
- A description of any restrictions on data availability

All relevant data supporting the key findings of this study are available within the article and its Supplementary Information files or from the corresponding author upon request. Source data, including full scan images of blotting data used in this study, are shown in Source Data file, which is provided with this paper. Exome sequencing data from the single individual, which was analyzed in the family, is not available due to concerns over patient privacy. Sequence data from the following GenBank accession numbers were used to generate expression constructs: NM\_001017579.1 and NM\_015703.4.

## Field-specific reporting

Please select the one below that is the best fit for your research. If you are not sure, read the appropriate sections before making your selection.

- Life sciences       Behavioural & social sciences       Ecological, evolutionary & environmental sciences

For a reference copy of the document with all sections, see [nature.com/documents/nr-reporting-summary-flat.pdf](https://nature.com/documents/nr-reporting-summary-flat.pdf)

## Life sciences study design

All studies must disclose on these points even when the disclosure is negative.

|                 |                                                                                                                                                      |
|-----------------|------------------------------------------------------------------------------------------------------------------------------------------------------|
| Sample size     | Sample sizes in cell culture and zebrafish studies were chosen to meet requirements for statistical analyses (n=3 or more independent experiments)   |
| Data exclusions | No data were excluded from the analyses                                                                                                              |
| Replication     | All attempts at replication were successful (n=3 or more of independent experiments)                                                                 |
| Randomization   | Randomization was not relevant on experimental designs. I.e. experimental controls were included in all experiments and data analysis was objective. |
| Blinding        | Quantifications of data from all initial experiments were subjected to blinded analysis. Further experiments were not subjective.                    |

## Reporting for specific materials, systems and methods

We require information from authors about some types of materials, experimental systems and methods used in many studies. Here, indicate whether each material, system or method listed is relevant to your study. If you are not sure if a list item applies to your research, read the appropriate section before selecting a response.

### Materials & experimental systems

| n/a                                 | Involved in the study                                           |
|-------------------------------------|-----------------------------------------------------------------|
| <input type="checkbox"/>            | <input checked="" type="checkbox"/> Antibodies                  |
| <input type="checkbox"/>            | <input checked="" type="checkbox"/> Eukaryotic cell lines       |
| <input checked="" type="checkbox"/> | <input type="checkbox"/> Palaeontology and archaeology          |
| <input type="checkbox"/>            | <input checked="" type="checkbox"/> Animals and other organisms |
| <input type="checkbox"/>            | <input checked="" type="checkbox"/> Human research participants |
| <input checked="" type="checkbox"/> | <input type="checkbox"/> Clinical data                          |
| <input checked="" type="checkbox"/> | <input type="checkbox"/> Dual use research of concern           |

### Methods

| n/a                                 | Involved in the study                                      |
|-------------------------------------|------------------------------------------------------------|
| <input checked="" type="checkbox"/> | <input type="checkbox"/> ChIP-seq                          |
| <input checked="" type="checkbox"/> | <input type="checkbox"/> Flow cytometry                    |
| <input type="checkbox"/>            | <input checked="" type="checkbox"/> MRI-based neuroimaging |

## Antibodies

|                 |                                                                                                                                                                                                                                                                                                                                                                                                                                                                                                                                                                                                                                                                                                                                                                                                                                                                                                       |
|-----------------|-------------------------------------------------------------------------------------------------------------------------------------------------------------------------------------------------------------------------------------------------------------------------------------------------------------------------------------------------------------------------------------------------------------------------------------------------------------------------------------------------------------------------------------------------------------------------------------------------------------------------------------------------------------------------------------------------------------------------------------------------------------------------------------------------------------------------------------------------------------------------------------------------------|
| Antibodies used | All information on primary and secondary antibodies is provided in the manuscript (please see Supplemental Tables 2 and 3)                                                                                                                                                                                                                                                                                                                                                                                                                                                                                                                                                                                                                                                                                                                                                                            |
| Validation      | All information on validation of primary antibodies is provided by the manufactures (please see Supplier and catalog number information in Supplemental Table 2). Further, the vast majority of primary antibodies were validated by the authors in previous published articles. Validation provided by manufactures:<br>Acetylated $\alpha$ -tubulin: <a href="https://www.sigmaldrich.com/catalog/product/sigma/t9026?lang=en&amp;region=DK&amp;gclid=Cj0KCQjwnqH7BRDdARIsACTSAduFd9Zlcg_tBHqp5W_LMlccQdtoK7ehqEgSrUis80TJLBRFSC0LTDQaAI06EALw_wCB">https://www.sigmaldrich.com/catalog/product/sigma/t9026?lang=en&amp;region=DK&amp;gclid=Cj0KCQjwnqH7BRDdARIsACTSAduFd9Zlcg_tBHqp5W_LMlccQdtoK7ehqEgSrUis80TJLBRFSC0LTDQaAI06EALw_wCB</a><br>ARL13B: <a href="https://www.ptglab.com/products/ARL13B-Antibody-17711-1-AP.htm">https://www.ptglab.com/products/ARL13B-Antibody-17711-1-AP.htm</a> |

gclid=Cj0KQCjwnqH7BRDdARIsACTSAdvU3PezbLlvzvfcThP0IWn5JoZNPiZLN5VCu7ga5p9dUT89zF9djQaApyNEALw\_wcB  
 $\alpha$ -tubulin: [https://www.sigmaaldrich.com/catalog/product/sigma/t5168?lang=en&region=DK&gclid=Cj0KQCjwnqH7BRDdARIsACTSAdvU3PezbLlvzvfcThP0IWn5JoZNPiZLN5VCu7ga5p9dUT89zF9djQaApyNEALw\\_wcB](https://www.sigmaaldrich.com/catalog/product/sigma/t5168?lang=en&region=DK&gclid=Cj0KQCjwnqH7BRDdARIsACTSAdvU3PezbLlvzvfcThP0IWn5JoZNPiZLN5VCu7ga5p9dUT89zF9djQaApyNEALw_wcB)  
 $\beta$ III-tubulin: <https://www.abcam.com/beta-iii-tubulin-antibody-neuronal-marker-ab18207.html>  
 BrDU: <https://www.citeab.com/antibodies/88841-ma1-82718-brdu-monoclonal-antibody-bu1-75-icr1>  
 GFP: <https://www.scbt.com/p/gfp-antibody-fl>  
 GFAP: <https://www.citeab.com/antibodies/2452274-z0334-glial-fibrillary-acidic-protein-gfap>  
 MAP2 (rabbit): <https://www.abcam.com/map2-antibody-neuronal-marker-ab32454.html>  
 MAP2 (chicken): <https://www.abcam.com/map2-antibody-ab5392.html>  
 DCTN1: <https://www.bdbiosciences.com/eu/applications/research/stem-cell-research/ectoderm-markers/human/purified-mouse-anti-p150-glued-1p150glued/p/610474>  
 NOL6 (ThermoFisher): <https://www.thermofisher.com/antibody/product/NOL6-Antibody-Polyclonal/PA5-30807>  
 NOL6 (Sigma-Aldrich): <https://www.sigmaaldrich.com/catalog/product/sigma/hpa055891?lang=en&region=DK>  
 NOL12: <https://www.abcam.com/nol12-antibody-ab111704.html>  
 PAX6: <https://www.abcam.com/pax6-antibody-ab5790.html>  
 Pericentrin-2: <https://www.citeab.com/antibodies/822236-sc-28145-pericentrin-2-c-16>  
 Phospho-RB: <https://www.cellsignal.com/products/primary-antibodies/phospho-rb-ser807-811-antibody/9308?Ntk=Products&Ntt=9308>  
 Phospho-CDK1 (Thr161): <https://www.cellsignal.com/products/primary-antibodies/phospho-cdc2-thr161-antibody/9114?Ntk=Products&Ntt=9114>  
 RRP7A (Abcam): <https://www.abcam.com/rrp7a-antibody-epr14412-c-terminal-ab185225.html>  
 RRP7A (Sigma): <https://www.sigmaaldrich.com/catalog/product/sigma/hpa001586?lang=en&region=DK>  
 RRP7A (Santa Cruz): <https://www.scbt.com/p/rrp7a-antibody-b-4>  
 SOX2: [https://www.rndsystems.com/products/human-mouse-rat-sox2-antibody-245610\\_mab2018](https://www.rndsystems.com/products/human-mouse-rat-sox2-antibody-245610_mab2018)  
 Vimentin (ThermoFisher): <https://www.thermofisher.com/antibody/product/Vimentin-Antibody-Polyclonal/PA1-16759>  
 Vimentin (Dako): [https://www.agilent.com/en/product/immunohistochemistry/antibodies-controls/primary-antibodies/vimentin-\(concentrate\)-76509](https://www.agilent.com/en/product/immunohistochemistry/antibodies-controls/primary-antibodies/vimentin-(concentrate)-76509)

## Eukaryotic cell lines

Policy information about [cell lines](#)

|                                                                   |                                                                                                                                                                                                                                                                                                                                                              |
|-------------------------------------------------------------------|--------------------------------------------------------------------------------------------------------------------------------------------------------------------------------------------------------------------------------------------------------------------------------------------------------------------------------------------------------------|
| Cell line source(s)                                               | Human dermal fibroblasts (HDFs): skin punch biopsies from 1) affected individuals homozygous for RRP7A, 2) MCPH patients homozygous for a WDR62 mutation, and 3) healthy control individuals. hTERT RPE-1 (RPE-1; ATCC; cat# CRL-4000), HEK293T (ATCC; cat# CRL-3216), P19.CL6 cells: lab stock (originally obtained from Riken Cell Bank, Ibaraki, Japan) . |
| Authentication                                                    | All cell lines were continuously validated by morphology, growth kinetics and/or differentiation status. Mutant/patient cell lines (HDFs and P19.CL6 cells) were continuously validated by western blotting and qRT-PCR analyses.                                                                                                                            |
| Mycoplasma contamination                                          | All cell lines were contiguously tested negative for mycoplasma                                                                                                                                                                                                                                                                                              |
| Commonly misidentified lines (See <a href="#">ICLAC</a> register) | no such included                                                                                                                                                                                                                                                                                                                                             |

## Animals and other organisms

Policy information about [studies involving animals](#); [ARRIVE guidelines](#) recommended for reporting animal research

|                         |                                                                                                                                                                                                                                                                                               |
|-------------------------|-----------------------------------------------------------------------------------------------------------------------------------------------------------------------------------------------------------------------------------------------------------------------------------------------|
| Laboratory animals      | The rrp7a mutant line (sa11429), acquired from ZIRC, were used as adults after being crossed to AB/TL line of 1-2 years old male and female adult zebrafish. All analyses were performed on F5-F7 larvae, generated by crosses of heterozygous 1-2 years old male and female adult zebrafish. |
| Wild animals            | The study did not involve wild animals.                                                                                                                                                                                                                                                       |
| Field-collected samples | The study did not involve samples collected from the field.                                                                                                                                                                                                                                   |
| Ethics oversight        | All experiments were conducted according to the guidelines of the Danish Animal Experiments Inspectorate (License number: 2017-15-0201-01279).                                                                                                                                                |

Note that full information on the approval of the study protocol must also be provided in the manuscript.

## Human research participants

Policy information about [studies involving human research participants](#)

|                            |                                                                                                                                                                                                                                                                                                                                                                                                                                                                                                               |
|----------------------------|---------------------------------------------------------------------------------------------------------------------------------------------------------------------------------------------------------------------------------------------------------------------------------------------------------------------------------------------------------------------------------------------------------------------------------------------------------------------------------------------------------------|
| Population characteristics | The five generation family with MCPH originates from the rural area in the Rahim Yar Khan district, in Punjab province of Pakistan. Clinical characteristics of affected family members (two males and six females) are shown in Supplementary Table I. The affected members had head circumference between 41 and 47 cm [-6 to -8 SD below population mean]. Age of affected family members were from 8-30 y.o. Tissue sections from a 19 wpc midgestation foetus was used for immunohistochemical analysis. |
|----------------------------|---------------------------------------------------------------------------------------------------------------------------------------------------------------------------------------------------------------------------------------------------------------------------------------------------------------------------------------------------------------------------------------------------------------------------------------------------------------------------------------------------------------|

|                  |                                                                                                                                                                                                                                                                                                                                                                                                                                                                                                                     |
|------------------|---------------------------------------------------------------------------------------------------------------------------------------------------------------------------------------------------------------------------------------------------------------------------------------------------------------------------------------------------------------------------------------------------------------------------------------------------------------------------------------------------------------------|
| Recruitment      | Recruitment, examination of patients and construction of family pedigree was performed by experienced clinical geneticists, researchers and postgraduate students. All clinical diagnoses were performed by medical doctors, thus no self-selection bias or other bias are likely to impact results. Informed consent was obtained from all participating individuals or their parents for the collection of blood and/or skin biopsy samples, genetic analyses, and publication of photos and genetic information. |
| Ethics oversight | The study followed the declaration of Helsinki and was approved by the Institutional Research Ethics Committee, National Institute for Biotechnology and Genetic Engineering, Faisalabad, Pakistan. Human fetal material was obtained in Denmark from legal abortions. Written and oral informed consent was given according to the Helsinki declaration II, approved by the Research Ethics Committee of the Capital Region (KF-V.100.1735/90).                                                                    |

Note that full information on the approval of the study protocol must also be provided in the manuscript.

## Magnetic resonance imaging

### Experimental design

|                                 |                                                                          |
|---------------------------------|--------------------------------------------------------------------------|
| Design type                     | Clinical MRI was performed to confirm MCPH phenotype in a single patient |
| Design specifications           | MRI Brain obtained in Axial, Coronal and Sagittal views                  |
| Behavioral performance measures | Behavioural performance and functional MRI was not measured.             |

### Acquisition

|                               |                                                                                                                                                                                                                                                                                                                                                                                                           |
|-------------------------------|-----------------------------------------------------------------------------------------------------------------------------------------------------------------------------------------------------------------------------------------------------------------------------------------------------------------------------------------------------------------------------------------------------------|
| Imaging type(s)               | Transversal Magnetic Resonance Imaging                                                                                                                                                                                                                                                                                                                                                                    |
| Field strength                | 1.5                                                                                                                                                                                                                                                                                                                                                                                                       |
| Sequence & imaging parameters | Multipolar Multisquential (T1W; T2W Flair and Diffusion Images). Acquisition Time: 1:38 and 0:42. Protocol Name: t2_blade_tra and t2_tse_sag_p2_320. Resolution Matrix: 256x35/320x240. Number of Slices: 19 unary, no units. FoV Read: 230 millimeter. FoV Phase: 100 percent. Repetition Time: 4000-4500 milliseconds. Echo Time: 99 milliseconds. Flip Angle: 150 degree. Protocol Name: t2_blade_tra. |
| Area of acquisition           | MRI Brain obtained in Axial, Coronal and Sagittal views, No.of Slices: 19 unary, no units, Slice thickness (5 millimeter)                                                                                                                                                                                                                                                                                 |
| Diffusion MRI                 | <input type="checkbox"/> Used <input checked="" type="checkbox"/> Not used                                                                                                                                                                                                                                                                                                                                |

### Preprocessing

|                            |                                                                                   |
|----------------------------|-----------------------------------------------------------------------------------|
| Preprocessing software     | syngo MR B17                                                                      |
| Normalization              | Not relevant (we did not perform functional magnetic resonance imaging analyses). |
| Normalization template     | Not relevant (we did not perform functional magnetic resonance imaging analyses). |
| Noise and artifact removal | Not relevant (we did not perform functional magnetic resonance imaging analyses). |
| Volume censoring           | Not relevant (we did not perform functional magnetic resonance imaging analyses). |

### Statistical modeling & inference

|                                                                           |                                                                                                                              |
|---------------------------------------------------------------------------|------------------------------------------------------------------------------------------------------------------------------|
| Model type and settings                                                   | Not relevant. We did not perform functional magnetic resonance imaging analyses, thus no statistical modeling was performed. |
| Effect(s) tested                                                          | Not relevant. We did not perform functional magnetic resonance imaging analyses, thus no effects were tested.                |
| Specify type of analysis:                                                 | <input type="checkbox"/> Whole brain <input type="checkbox"/> ROI-based <input type="checkbox"/> Both                        |
| Statistic type for inference<br>(See <a href="#">Eklund et al. 2016</a> ) | Not relevant (we did not perform functional magnetic resonance imaging analyses).                                            |
| Correction                                                                | Not relevant (we did not perform functional magnetic resonance imaging analyses).                                            |

### Models & analysis

|                                     |                                                                       |
|-------------------------------------|-----------------------------------------------------------------------|
| n/a                                 | Involved in the study                                                 |
| <input checked="" type="checkbox"/> | <input type="checkbox"/> Functional and/or effective connectivity     |
| <input checked="" type="checkbox"/> | <input type="checkbox"/> Graph analysis                               |
| <input checked="" type="checkbox"/> | <input type="checkbox"/> Multivariate modeling or predictive analysis |
